# Supplementary material
Source: Springer Nature journal article supplement (https://www.springermedizin.de/resource/supplementary/12937_2012_613_MOESM2_ESM.pdf/25653776)
Supplement: MOESM2 [file 25653776]

# these fish

all have **DHA**  
and are **low in mercury**

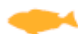

**ONE 6-ounce serving**  
of these fish each  
week will give you the  
recommended weekly  
amount of DHA:

- salmon (farm raised, wild caught, or canned)
- whitefish/walleye
- herring
- anchovies (canned)
- trout (farm raised)

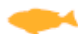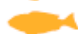

**TWO 6-ounce servings**  
(12 ounces total) of  
these fish each week  
will give you the  
recommended weekly  
amount of DHA:

- atlantic mackerel
- sardines (canned)
- trout (wild caught)
- mussels
- pollock
- salt cod/bacalao

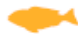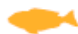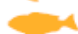

**THREE 6-ounce servings**  
(18 ounces total) of  
these fish each week  
will give you the  
recommended weekly  
amount of DHA:

- squid/calamari
- ocean perch
- flatfish
- flounder
- sole

These fish have  
less DHA, but  
they are still  
a good source  
of protein and  
other nutrients:

- whiting
- scallops
- octopus
- haddock
- cod
- clams
- shrimp
- tilapia
- catfish
- eel
- crayfish
- crab  
(includes  
imitation  
crab)

If you eat tuna, choose chunk light tuna.
